# Supplementary material
Source: PubMed Central journal article supplement (PMC4149903)

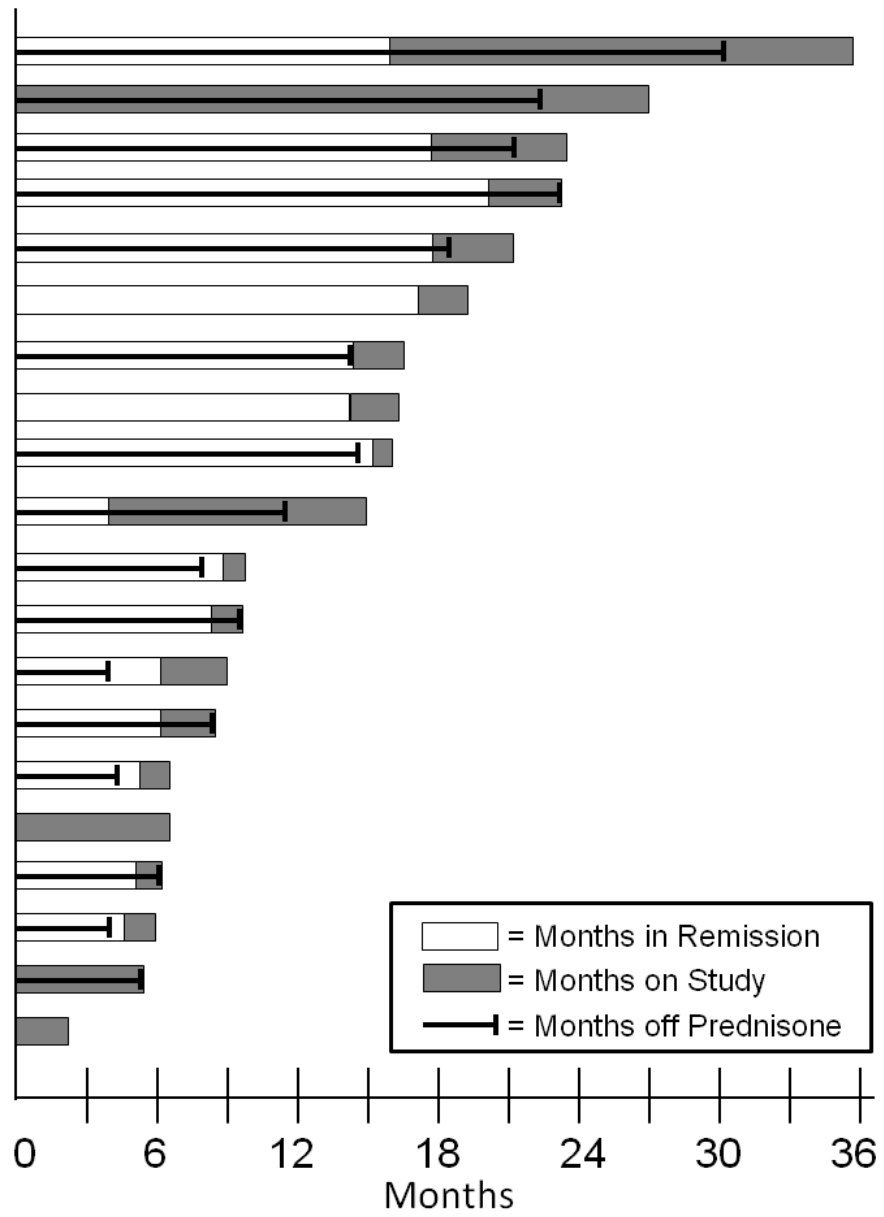

Supplement: NIHMS598432-supplement-Supplementary_Data_-_Figures.pdf [file NIHMS598432-supplement-Supplementary_Data_-_Figures.pdf]
